# Supplementary material
Source: PubMed Central journal article supplement (PMC5031550)

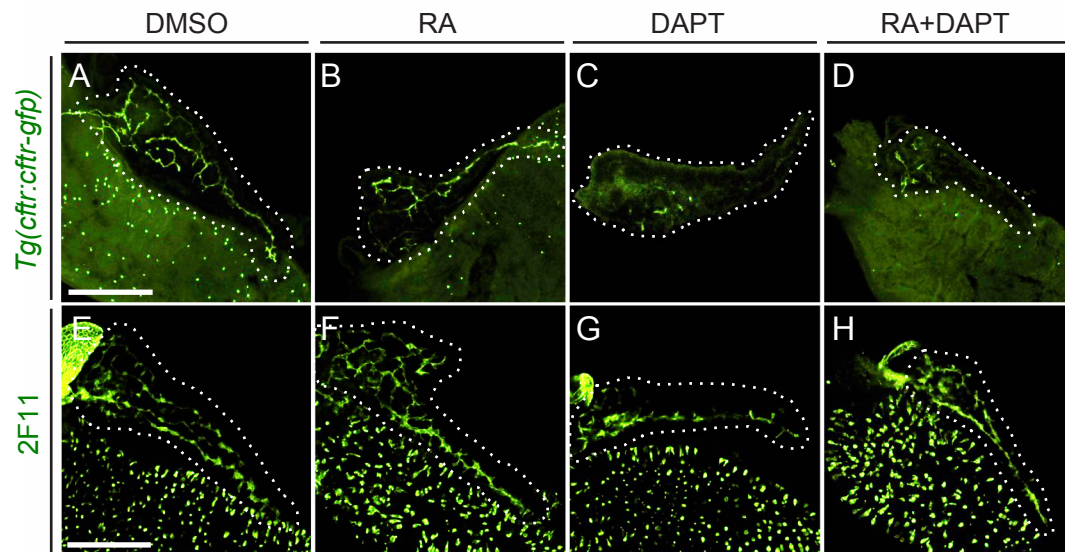

Figure 2

Supplement: NIHMS813670-supplement-1.pdf [file NIHMS813670-supplement-1.pdf]

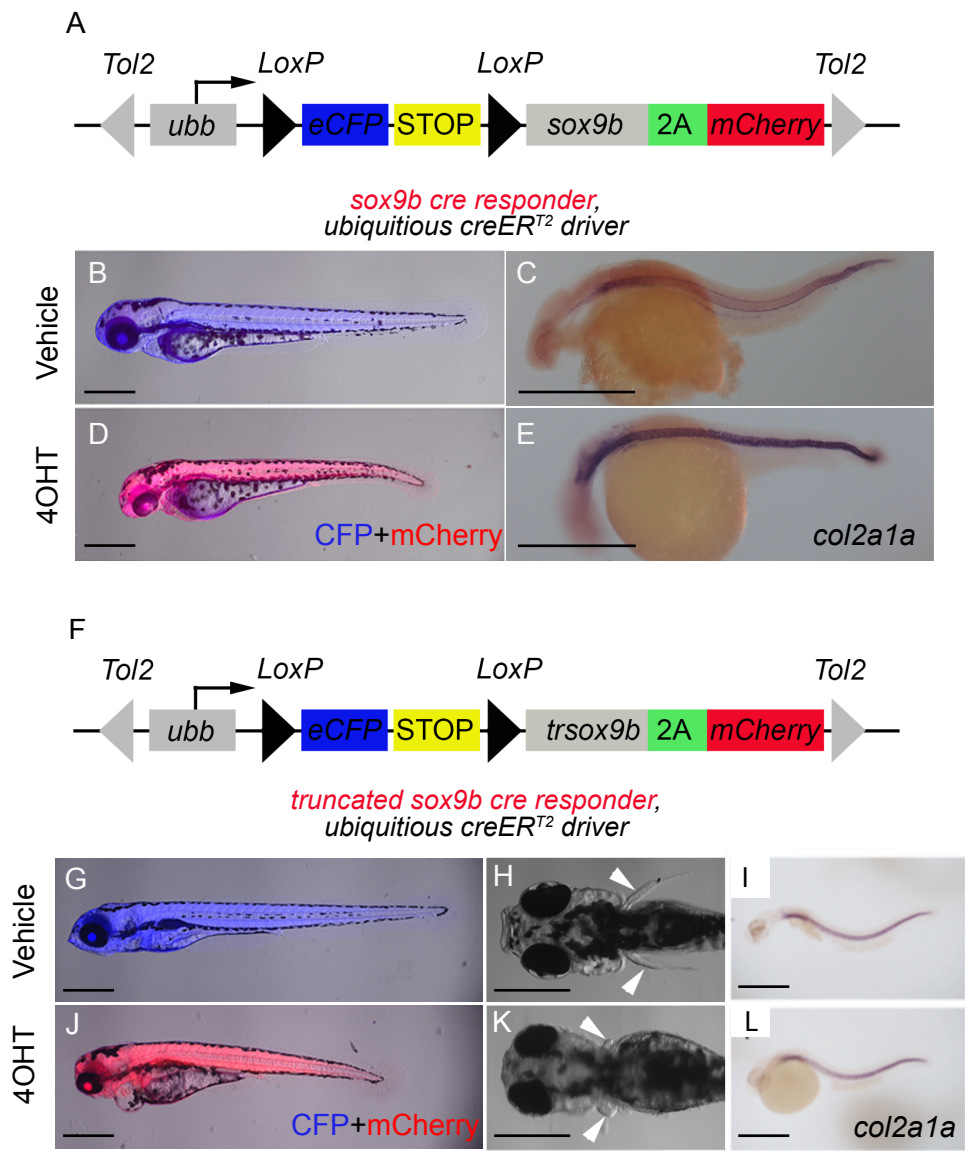

Figure 3

Supplement: NIHMS813670-supplement-2.pdf [file NIHMS813670-supplement-2.pdf]

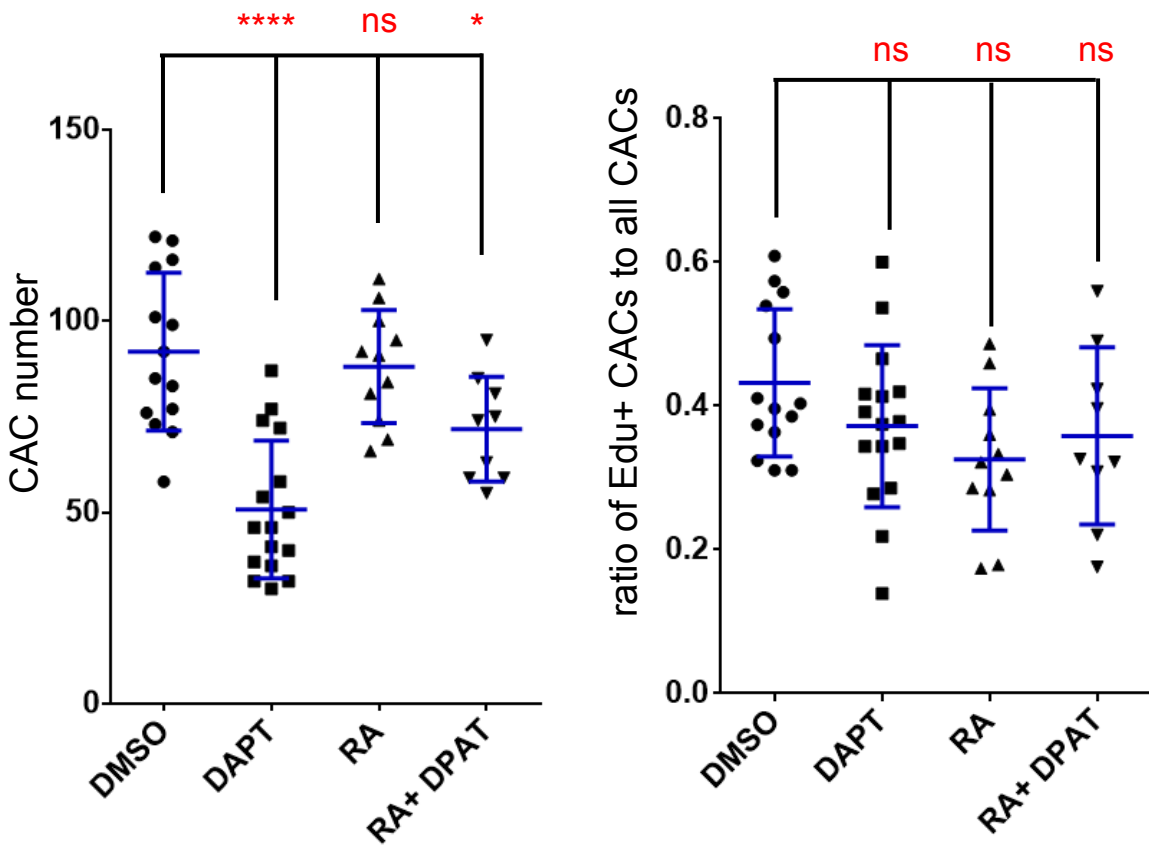

Supplemental Figure 2

Supplement: NIHMS813670-supplement-3.pdf [file NIHMS813670-supplement-3.pdf]

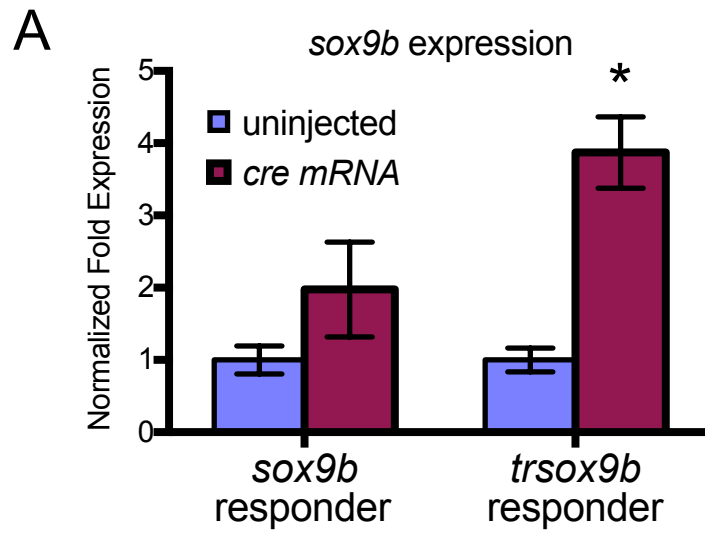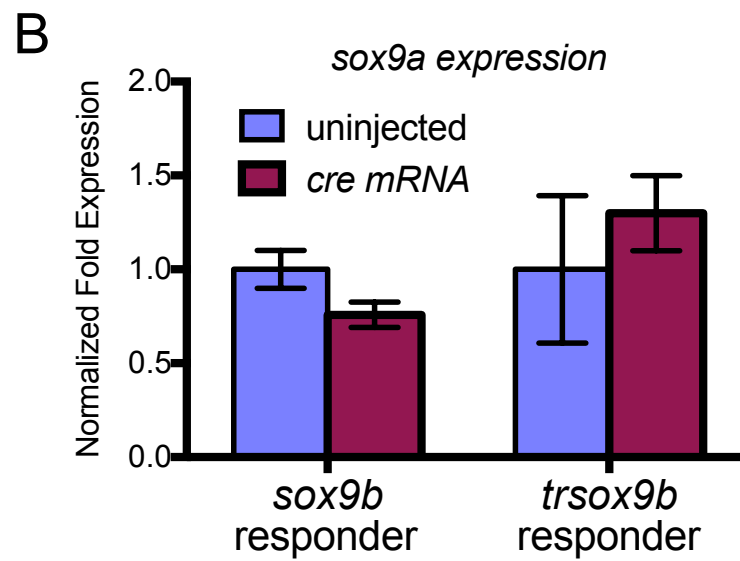

Supplemental Figure 3

Supplement: NIHMS813670-supplement-4.pdf [file NIHMS813670-supplement-4.pdf]

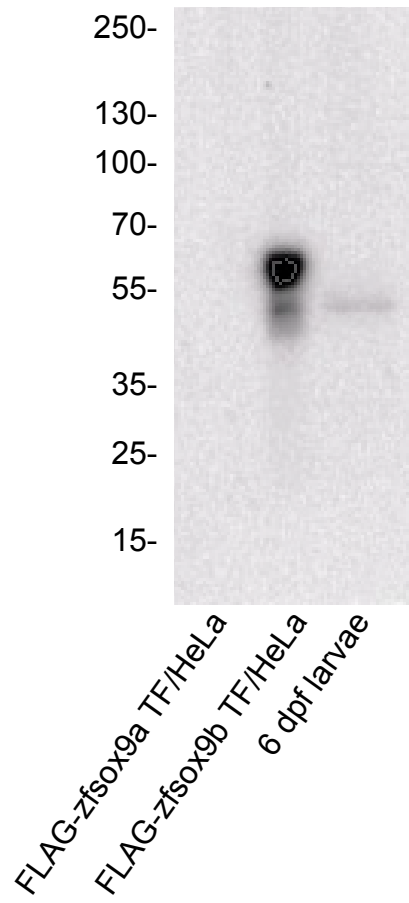

Supplemental Figure 4

Supplement: NIHMS813670-supplement-5.pdf [file NIHMS813670-supplement-5.pdf]
